# Supplementary material for: Investigation of Cowpea (Vigna unguiculata (L.) Walp.)–Insect Pollinator Interactions Aiming to Increase Cowpea Yield and Define New Breeding Tools
Source: MDPI journal article supplement (doi:10.3390/ecologies4010010), 2023-02-14
Supplement: s1 [file s1]

### Supplementary Materials

**Supplementary Material S1.** Mean, max and min monthly air temperature (°C), monthly total precipitation (mm) and average monthly wind speed (km h<sup>-1</sup>) during cultivation (May-October 2017).

| Month     | Mean air temperature (°C) | Max air temperature (°C) | Min air temperature (°C) | Precipitation (mm) | Average wind speed (km h <sup>-1</sup> ) |
|-----------|---------------------------|--------------------------|--------------------------|--------------------|------------------------------------------|
| May       | 21.7                      | 34.5                     | 14                       | 57.2               | 4.2                                      |
| June      | 26.2                      | 41.3                     | 16.9                     | 69.2               | 2.9                                      |
| July      | 29.7                      | 41.1                     | 19.8                     | 7.4                | 6.0                                      |
| August    | 29.7                      | 38.3                     | 20.9                     | 1.4                | 7.3                                      |
| September | 25.1                      | 36.5                     | 17.3                     | 20                 | 3.7                                      |
| October   | 19.4                      | 27.4                     | 12.7                     | 6.6                | 3.4                                      |

**Supplementary Material S2.** Time of flowers opening per accession for each observation date.

| Accessions   | 13/7 | 19/7 | 20/7 | 27/7 | 31/7 | 3/8  | 5/8   | 9/8  | 18/8 | 29/8 | 5/9  |
|--------------|------|------|------|------|------|------|-------|------|------|------|------|
| IT97K-499-35 |      |      |      | 7:50 | 7:30 | 7:45 | 7:50  | 8:20 | 8:00 | 8:00 | 7:30 |
| VG2          | 7:30 | 7:45 | 7:40 | 7:00 | 7:00 |      | 7:40  | 8:05 | 7:30 | 8:00 | 8:00 |
| VG21         |      | 7:48 | 7:50 | 8:20 | 7:15 |      | 7:50  | 8:15 | 7:50 | 8:00 | 8:10 |
| Vg60         | 8:00 | 7:45 | 8:15 | 8:15 | 7:15 |      | 7:50  | 8:10 | 7:50 | 8:00 | 8:15 |
| BGE038478    |      |      |      |      |      |      | 8:25  | 8:15 | 7:30 | 8:00 | 7:30 |
| BGE038479    |      |      | 7:15 |      |      | 7:40 | 10:45 | 8:15 | 7:45 | 8:00 | 7:30 |

**Supplementary Material S3.** Time of flowers closure per accession for each observation date.

| Accessions   | 13/7  | 19/7  | 20/7  | 27/7  | 31/7  | 3/8   | 5/8   | 9/8   | 18/8  | 29/8  | 5/9   |
|--------------|-------|-------|-------|-------|-------|-------|-------|-------|-------|-------|-------|
| IT97K-499-35 |       |       |       | 10:20 | 10:20 | 10:15 | 10:30 | 11:00 | 10:00 | 10:00 | 10:20 |
| VG2          | 13:30 | 13:30 | 10:20 | 10:20 | 10:00 |       | 10:40 | 11:30 | 9:50  | 10:00 | 10:00 |
| VG21         |       | 13:30 | 10:30 | 10:30 | 10:20 |       | 11:45 | 11:00 | 10:20 | 10:30 | 10:20 |
| Vg60         | 13:30 | 13:30 | 10:10 | 10:10 | 10:15 |       | 11:00 | 11:15 | 10:15 | 10:30 | 10:15 |
| BGE038478    |       |       |       |       |       |       | 11:10 | 11:00 | 10:30 | 10:30 | 10:30 |
| BGE038479    |       |       | 10:30 |       |       | 11:20 | 11:30 | 11:10 | 10:25 | 10:30 | 10:30 |

**Supplementary Material S4.** Mean number of open flowers per plant for each accession and observation date. Means  $\pm$  SE in columns with different letters are significantly different at the 0.05 level, by *Tukey's* HSD means comparison method.

| Accessions            | 13/7            | 19/7            | 20/7            | 27/7            | 31/7            | 3/8              | 5/8               | 9/8             | 18/8              | 29/8            | 5/9             |
|-----------------------|-----------------|-----------------|-----------------|-----------------|-----------------|------------------|-------------------|-----------------|-------------------|-----------------|-----------------|
| IT97K-499-35          |                 |                 |                 | 2.17 $\pm$ 0.54 | 1.75 $\pm$ 0.25 | 2.00 $\pm$ 0.01a | 1.67 $\pm$ 0.17b  | 2.67 $\pm$ 0.67 | 1.67 $\pm$ 0.33b  | 1.40 $\pm$ 0.24 | 2.57 $\pm$ 0.37 |
| VG2                   | 1.00 $\pm$ 0.01 | 1.80 $\pm$ 0.58 | 1.33 $\pm$ 0.33 | 1.29 $\pm$ 0.12 | 1.58 $\pm$ 0.36 |                  | 2.42 $\pm$ 0.20ab | 2.00 $\pm$ 0.01 | 3.00 $\pm$ 0.01a  | 2.00 $\pm$ 0.01 | 2.00 $\pm$ 0.01 |
| VG21                  |                 | 2.14 $\pm$ 0.63 | 1.93 $\pm$ 0.25 | 2.00 $\pm$ 0.31 | 1.94 $\pm$ 0.31 |                  | 2.91 $\pm$ 0.21a  | 2.50 $\pm$ 0.38 | 2.00 $\pm$ 0.01ab | 2.56 $\pm$ 0.22 | 3.00 $\pm$ 0.01 |
| Vg60                  | 2.00 $\pm$ 0.40 | 1.86 $\pm$ 0.34 | 1.44 $\pm$ 0.24 | 1.50 $\pm$ 0.29 | 2.08 $\pm$ 0.42 |                  | 2.81 $\pm$ 0.19a  | 2.25 $\pm$ 0.25 | 2.00 $\pm$ 0.01ab | 3.00 $\pm$ 0.33 | 1.50 $\pm$ 0.29 |
| BGE038478             |                 |                 |                 |                 |                 |                  | 1.50 $\pm$ 0.50b  | 2.00 $\pm$ 0.01 | 2.00 $\pm$ 0.01ab | 2.59 $\pm$ 0.20 | 2.50 $\pm$ 0.50 |
| BGE038479             |                 |                 | 1.00 $\pm$ 0.01 |                 |                 | 1.00 $\pm$ 0.01b | 2.00 $\pm$ 0.01ab | 1.83 $\pm$ 0.17 | 1.75 $\pm$ 0.25b  | 2.42 $\pm$ 0.17 | 2.00 $\pm$ 0.15 |
| Level of significance | ns              | ns              | ns              | ns              | ns              | ***              | **                | ns              | *                 | ns              | ns              |

ns non-significant difference

\* Statistically significant difference at a level 0.05

\*\* Statistically significant difference at a level 0.01

\*\*\* Statistically significant difference at a level 0.001

**Supplementary Material S5.** Design flower petal traits studied for each accession and coefficients of variation (CV%) for each accession and trait. Means  $\pm$  SE in columns with different letters are significantly different at the 0.05 level, by *Tukey's* HSD means comparison method.

| Accessions            | SPL (cm)          | SPW (cm)         | SPA (cm <sup>2</sup> ) | SPP (cm)          | SPAN (°)           | FTUBL (cm)        | KL (cm)           | KW (cm)           | KP (cm)           | KOP (cm)        | KAN (°)           | SPL/SPW           | SPL/KL            |
|-----------------------|-------------------|------------------|------------------------|-------------------|--------------------|-------------------|-------------------|-------------------|-------------------|-----------------|-------------------|-------------------|-------------------|
| IT97K-499-35          | 2.25 $\pm$ 0.02bc | 1.17 $\pm$ 0.02a | 557.34 $\pm$ 10.49b    | 6.77 $\pm$ 0.06ab | 62.51 $\pm$ 1.06ab | 1.14 $\pm$ 0.02cd | 2.07 $\pm$ 0.02ab | 1.17 $\pm$ 0.01ab | 6.19 $\pm$ 0.05ab | 0.74 $\pm$ 0.01 | 126.38 $\pm$ 1.12 | 1.94 $\pm$ 0.03d  | 1.10 $\pm$ 0.02b  |
| CV%                   | 10.06             | 11.13            | 15.17                  | 6.89              | 13.50              | 15.15             | 6.31              | 8.85              | 5.88              | 9.53            | 7.13              | 13.04             | 13.27             |
| VG2                   | 2.11 $\pm$ 0.01d  | 1.04 $\pm$ 0.01c | 515.99 $\pm$ 6.95c     | 6.79 $\pm$ 0.05ab | 60.77 $\pm$ 0.57bc | 1.10 $\pm$ 0.01d  | 2.07 $\pm$ 0.01ab | 1.19 $\pm$ 0.01ab | 6.14 $\pm$ 0.03bc | 0.71 $\pm$ 0.01 | 125.93 $\pm$ 0.96 | 2.06 $\pm$ 0.03bc | 1.03 $\pm$ 0.01c  |
| CV%                   | 6.14              | 11.39            | 11.89                  | 6.53              | 8.35               | 9.83              | 5.21              | 7.69              | 4.54              | 12.15           | 6.70              | 11.10             | 9.11              |
| VG21                  | 2.21 $\pm$ 0.02c  | 1.03 $\pm$ 0.01c | 568.43 $\pm$ 7.65b     | 6.90 $\pm$ 0.05a  | 61.72 $\pm$ 0.54b  | 1.22 $\pm$ 0.02ab | 2.12 $\pm$ 0.01a  | 1.21 $\pm$ 0.01a  | 6.25 $\pm$ 0.03a  | 0.72 $\pm$ 0.01 | 127.22 $\pm$ 0.92 | 2.18 $\pm$ 0.03a  | 1.05 $\pm$ 0.01c  |
| CV%                   | 6.22              | 12.34            | 12.04                  | 6.44              | 7.77               | 16.53             | 4.57              | 6.89              | 3.85              | 9.34            | 6.36              | 13.37             | 8.96              |
| Vg60                  | 2.26 $\pm$ 0.01bc | 1.09 $\pm$ 0.01b | 603.31 $\pm$ 8.04a     | 6.65 $\pm$ 0.05bc | 64.60 $\pm$ 0.64a  | 1.19 $\pm$ 0.02bc | 2.07 $\pm$ 0.02b  | 1.16 $\pm$ 0.01b  | 5.97 $\pm$ 0.04d  | 0.70 $\pm$ 0.01 | 129.70 $\pm$ 0.99 | 2.07 $\pm$ 0.03b  | 1.10 $\pm$ 0.01b  |
| CV%                   | 5.65              | 11.83            | 11.91                  | 6.46              | 8.80               | 12.32             | 6.55              | 7.96              | 5.30              | 9.13            | 6.80              | 10.86             | 8.03              |
| BGE038478             | 2.35 $\pm$ 0.02a  | 1.22 $\pm$ 0.01a | 575.68 $\pm$ 7.37ab    | 6.54 $\pm$ 0.05c  | 58.99 $\pm$ 70.58c | 1.27 $\pm$ 0.02a  | 2.04 $\pm$ 0.01b  | 1.16 $\pm$ 0.01b  | 6.02 $\pm$ 0.03d  | 0.72 $\pm$ 0.01 | 128.27 $\pm$ 1.16 | 1.93 $\pm$ 0.02d  | 1.16 $\pm$ 0.01a  |
| CV%                   | 6.41              | 8.94             | 11.45                  | 6.65              | 8.28               | 11.49             | 6.46              | 7.66              | 4.90              | 13.01           | 8.07              | 8.47              | 8.96              |
| BGE038479             | 2.31 $\pm$ 0.02ab | 1.19 $\pm$ 0.01a | 549.35 $\pm$ 8.19b     | 6.51 $\pm$ 0.05c  | 60.73 $\pm$ 0.58bc | 1.24 $\pm$ 0.02ab | 2.06 $\pm$ 0.01b  | 1.17 $\pm$ 0.01b  | 6.05 $\pm$ 0.02cd | 0.71 $\pm$ 0.01 | 126.62 $\pm$ 1.08 | 1.96 $\pm$ 0.02cd | 1.12 $\pm$ 0.01ab |
| CV%                   | 6.54              | 8.58             | 12.82                  | 6.18              | 8.01               | 12.81             | 5.64              | 6.41              | 4.94              | 10.76           | 7.26              | 10.08             | 7.95              |
| Level of significance | ***               | ***              | ***                    | ***               | ***                | ***               | **                | **                | ***               | ns              | ns                | ***               | ***               |

ns non-significant difference; \*\* Statistically significant difference at a level 0.01; \*\*\* Statistically significant difference at a level 0.001

SPL. maximum standard petal length; SPW. standard petal width; SPA. standard petal area; SPP. standard petal perimeter; SPAN. standard petal angle; FTUBL. floral-tube length; KL. keel petal length; KW. keel petal width; KP. keel petal perimeter; KOP. keel opening; KAN. keel angle; SPL/SPW. maximum standard petal length/ standard petal width ratio; SPL/KL. maximum standard petal length/ keel petal perimeter ratio

**Supplementary Material S6.** Design flower's sexual dimension and male and vector matching traits studied for each accession and coefficients of variation (CV%) for each accession and trait. Means  $\pm$  SE in columns with different letters are significantly different at the 0.05 level, by *Tukey's* HSD means comparison method.

| Accessions            | STL (cm)            | OL (cm)             | SL (cm)             | SOA (°)              | ON                 |
|-----------------------|---------------------|---------------------|---------------------|----------------------|--------------------|
| IT97K-499-35          | 0.767 $\pm$ 0.012b  | 1.995 $\pm$ 0.029ab | 0.786 $\pm$ 0.012a  | 104.59 $\pm$ 1.68c   | 10.13 $\pm$ 0.34bc |
| CV%                   | 12.89               | 11.92               | 12.34               | 14.39                | 26.36              |
| VG2                   | 0.764 $\pm$ 0.011b  | 1.986 $\pm$ 0.026ab | 0.765 $\pm$ 0.009ab | 105.21 $\pm$ 1.25bc  | 10.63 $\pm$ 0.33ab |
| CV%                   | 12.28               | 11.33               | 10.75               | 12.19                | 26.03              |
| VG21                  | 0.819 $\pm$ 0.011a  | 2.029 $\pm$ 0.021a  | 0.790 $\pm$ 0.011a  | 105.67 $\pm$ 1.26bc  | 11.44 $\pm$ 0.28a  |
| CV%                   | 12.14               | 9.44                | 13.00               | 11.47                | 20.55              |
| Vg60                  | 0.768 $\pm$ 0.015b  | 1.931 $\pm$ 0.028ab | 0.739 $\pm$ 0.012b  | 111.49 $\pm$ 1.72ab  | 10.01 $\pm$ 0.33bc |
| CV%                   | 17.31               | 13.18               | 13.90               | 15.12                | 28.51              |
| BGE038478             | 0.781 $\pm$ 0.011ab | 1.882 $\pm$ 0.029b  | 0.737 $\pm$ 0.011b  | 114.35 $\pm$ 1.89a   | 9.26 $\pm$ 0.32c   |
| CV%                   | 12.40               | 13.83               | 13.59               | 15.25                | 29.49              |
| BGE038479             | 0.774 $\pm$ 0.013ab | 1.966 $\pm$ 0.030ab | 0.724 $\pm$ 0.012b  | 110.44 $\pm$ 1.81abc | 9.41 $\pm$ 0.30bc  |
| CV%                   | 14.02               | 12.83               | 13.48               | 17.11                | 25.91              |
| Level of significance | **                  | **                  | ***                 | ***                  | ***                |

\*\* Statistically significant difference at a level 0.01, \*\*\* Statistically significant difference at a level 0.001  
STL. stamen length; OL. ovary length; SL. style length; SOA. ovary-style angle; ON. number of ovules
